# Supplementary material for: Antibacterial Efficacy of N-(4-methylpyridin-2-yl) Thiophene-2-Carboxamide Analogues against Extended-Spectrum-β-Lactamase Producing Clinical Strain of Escherichia coli ST 131
Source: MDPI journal article supplement (doi:10.3390/molecules28073118), 2023-03-31
Supplement: s1 [file s1]

## Supplementary Data

### Anti-bacterial efficacy of *N*-(4-methylpyridin-2-yl) thiophene-2-carboxamide analogues against extended-spectrum- $\beta$ -lactamase producing clinical strain of *Escherichia coli* ST 131

Gulraiz Ahmad <sup>1</sup>, Aqsa Khalid <sup>2</sup>, Muhammad Usman Qamar <sup>3</sup>, Nasir Rasool <sup>1,\*</sup>, Malik Saadullah <sup>4</sup>, Muhammad Bilal<sup>5</sup>, Majed A. Bajaber <sup>6</sup>, Ahmad J. Obaidullah <sup>7</sup>, Hadil Faris Alotaibi <sup>8</sup>, Jawaher M. Alotaibi <sup>7</sup>

<sup>1</sup> Department of Chemistry, Government College, University Faisalabad, 38000, Pakistan; [gulchemist35@gmail.com](mailto:gulchemist35@gmail.com)

<sup>2</sup> School of Interdisciplinary Engineering & Science (SINES), National University of Sciences and Technology (NUST), Islamabad 44000, Pakistan; [aqsa.khalid30@yahoo.com](mailto:aqsa.khalid30@yahoo.com)

<sup>3</sup> Department of Microbiology, Faculty of Life Sciences, Government College University Faisalabad; [musmanqamar@gcuf.edu.pk](mailto:musmanqamar@gcuf.edu.pk)

<sup>4</sup> Department of Pharmaceutical Chemistry Government College University Faisalabad; [maliksaadullah@gcuf.edu.pk](mailto:maliksaadullah@gcuf.edu.pk)

<sup>5</sup> School of Chemistry and Chemical Engineering, Shandong University, Jinan 250100, China; [muhammadbilalgucf@gmail.com](mailto:muhammadbilalgucf@gmail.com)

<sup>6</sup> Chemistry Department, Faculty of Science, King Khalid University, P.O. Box 9004, Abha 61413, Saudi Arabia. [mb@kku.edu.sa](mailto:mb@kku.edu.sa)

<sup>7</sup> Department of Pharmaceutical Chemistry, College of Pharmacy, King Saud University, P.O. Box 2457, Riyadh 11451, Saudi Arabia; [aobaidullah@ksu.edu.sa](mailto:aobaidullah@ksu.edu.sa) (A.J.O.), [441203066@student.ksu.edu.sa](mailto:441203066@student.ksu.edu.sa) (J.M.A.)

<sup>8</sup> Department of Pharmaceutical Sciences, College of Pharmacy, Princess Nourah bint AbdulRahman University, Riyadh 11671, Saudi Arabia; [hfalotaibi@pnu.edu.sa](mailto:hfalotaibi@pnu.edu.sa)

\* Correspondence: [nasirrasool@gcuf.edu.pk](mailto:nasirrasool@gcuf.edu.pk); Tel.: +92-332-7491790 (N.R.)

## Table of Contents

|                                                                                                                                                                                                                                                                                                                                                                                                                                                               |            |
|---------------------------------------------------------------------------------------------------------------------------------------------------------------------------------------------------------------------------------------------------------------------------------------------------------------------------------------------------------------------------------------------------------------------------------------------------------------|------------|
| <b>Table S1:</b> Energy score and Root Mean Square Deviations (RMSDs) of selected docked poses .....                                                                                                                                                                                                                                                                                                                                                          | <b>S3</b>  |
| <b>Figure S1:</b> Protein ligand interaction analysis of ligands with Beta-lactamase from Escherichia coli (6N9K) protein (A) 6N9K interactions with <b>4b</b> compound (B) 6N9K interactions with <b>4d</b> compound (C) 6N9K interactions with <b>4e</b> compound (D) 6N9K interactions with <b>4f</b> compound (E) 6N9K interactions with <b>4g</b> compound (F) 6N9K interactions with <b>4h</b> compound .....                                           | <b>S4</b>  |
| <b>Figure S2:</b> Docking interaction of tazobactam reported as $\beta$ -lactamase inhibitors with CTX-M-15 enzyme (PDB ID: 7BDS) .....                                                                                                                                                                                                                                                                                                                       | <b>S5</b>  |
| <b>Figure S3:</b> Protein ligand interaction analysis of ligands with Beta-lactamase from Klebsiella pneumonia having expression in Escherichia coli (7BDS) protein (A) 7BDS interactions with <b>4b</b> compound (B) 7BDS interactions with <b>4d</b> compound (C) 7BDS interactions with <b>4e</b> compound (D) 6N9K interactions with <b>4f</b> compound (E) 7BDS interactions with <b>4g</b> compound (F) 7BDS interactions with <b>4h</b> compound ..... | <b>S6</b>  |
| <b>Figure S4:</b> $^1\text{H}$ NMR spectrum of compound <b>3</b> .....                                                                                                                                                                                                                                                                                                                                                                                        | <b>S7</b>  |
| <b>Figure S5:</b> $^{13}\text{C}$ NMR spectrum of compound <b>4a</b> .....                                                                                                                                                                                                                                                                                                                                                                                    | <b>S7</b>  |
| <b>Figure S6:</b> $^1\text{H}$ NMR spectrum of compound <b>4b</b> .....                                                                                                                                                                                                                                                                                                                                                                                       | <b>S8</b>  |
| <b>Figure S7:</b> $^1\text{H}$ NMR spectrum of compound <b>4c</b> .....                                                                                                                                                                                                                                                                                                                                                                                       | <b>S8</b>  |
| <b>Figure S8:</b> $^1\text{H}$ NMR spectrum of compound <b>4d</b> .....                                                                                                                                                                                                                                                                                                                                                                                       | <b>S9</b>  |
| <b>Figure S9:</b> $^1\text{H}$ NMR spectrum of compound <b>4e</b> .....                                                                                                                                                                                                                                                                                                                                                                                       | <b>S9</b>  |
| <b>Figure S10:</b> $^1\text{H}$ NMR spectrum of compound <b>4f</b> .....                                                                                                                                                                                                                                                                                                                                                                                      | <b>S10</b> |
| <b>Figure S11:</b> $^{13}\text{C}$ NMR spectrum of compound <b>4f</b> .....                                                                                                                                                                                                                                                                                                                                                                                   | <b>S10</b> |
| <b>Figure S12:</b> $^1\text{H}$ NMR spectrum of compound <b>4g</b> .....                                                                                                                                                                                                                                                                                                                                                                                      | <b>S11</b> |
| <b>Figure S13:</b> $^{13}\text{C}$ NMR spectrum of compound <b>4g</b> .....                                                                                                                                                                                                                                                                                                                                                                                   | <b>S11</b> |
| <b>Figure S14:</b> $^1\text{H}$ NMR spectrum of compound <b>4h</b> .....                                                                                                                                                                                                                                                                                                                                                                                      | <b>S12</b> |

**Table S1:** Energy score and Root Mean Square Deviations (RMSDs) of selected docked poses

| Ligands           | 6N9K    |      |                                                                                 |
|-------------------|---------|------|---------------------------------------------------------------------------------|
|                   | S-score | RMSD | Interacting Residues                                                            |
| <b>4a</b>         | -5.2    | 3.3  | Hydrogen bonding: R257<br>Hydrophobic: N255, D258                               |
| <b>4b</b>         | -4.6    | 1.5  | Hydrogen bonding: Y219, K358<br>Hydrophobic: D63, A65, A224, W217               |
| <b>4c</b>         | -5.3    | 1.6  | Hydrogen bonding: Y219, K358<br>Hydrophobic: T219, W217, A224                   |
| <b>4d</b>         | -4.7    | 2.08 | Hydrogen bonding: K358<br>Hydrophobic: P42, I64                                 |
| <b>4e</b>         | -4.8    | 3.0  | Hydrogen bonding: G222<br>Hydrophobic: P42, Y219, I64, A224                     |
| <b>4f</b>         | -4.6    | 2.8  | Hydrophobic: P42, I64, Y219, A224                                               |
| <b>4g</b>         | -4.2    | 1.9  | Hydrophobic: P42, I64, Y219, A224                                               |
| <b>4h</b>         | -5.0    | 2.0  | Hydrophobic: I64, A65, W217, Y219, A224                                         |
| 7BDS              |         |      |                                                                                 |
| <b>Tazobactam</b> | -5.4    | 2.78 | Hydrogen bonding: R44, E64, R65, A172, T264                                     |
| <b>4a</b>         | -6.6    | 1.5  | Hydrogen bonding: S130, S220, G236<br>Hydrophobic: Y105, A219, R274             |
| <b>4b</b>         | -6.4    | 2.7  | Hydrogen bonding: S130, S220, G236<br>Hydrophobic: Y105, A219, S237, R274       |
| <b>4c</b>         | -6.5    | 1.3  | Hydrogen bonding: S130, P167<br>Hydrophobic: S237                               |
| <b>4d</b>         | -6.5    | 1.6  | Hydrogen bonding: S130<br>Hydrophobic: Y105, A219, S237                         |
| <b>4e</b>         | -6.4    | 3.6  | Hydrogen bonding: N132<br>Hydrophobic: Y105, N170, S237, G238,                  |
| <b>4f</b>         | -6.4    | 1.9  | Hydrogen bonding: P167, N170, T216<br>Hydrophobic: S237, G238                   |
| <b>4g</b>         | -6.3    | 2.3  | Hydrogen bonding: K73, N132<br>Hydrophobic: Y105, A219, S237, R274              |
| <b>4h</b>         | -6.4    | 3.0  | Hydrogen bonding: S130, G236, S220<br>Hydrophobic: Y105, P167, A219, S237, R274 |

\*S-score represents the binding energy of the protein-ligand complex

**A**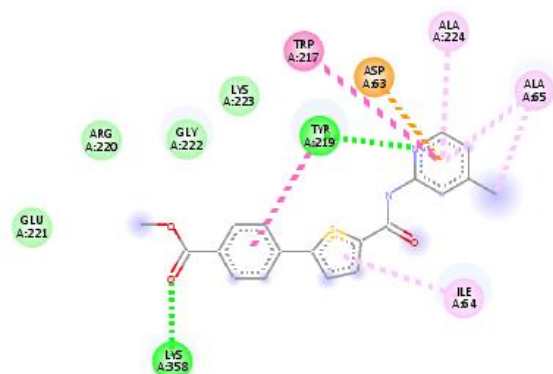**B**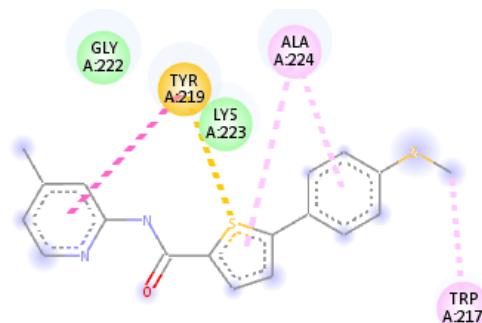**C**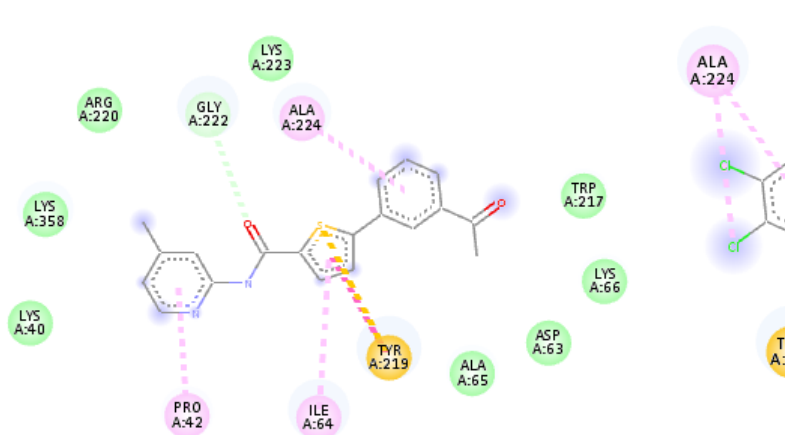**D**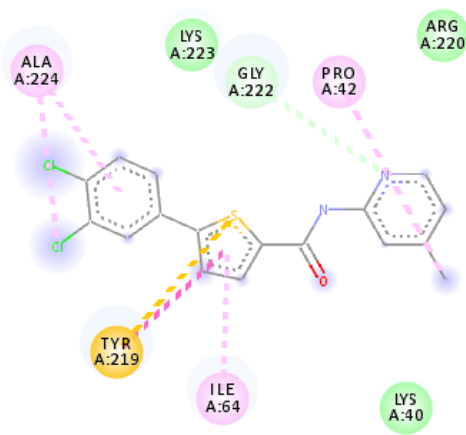**E**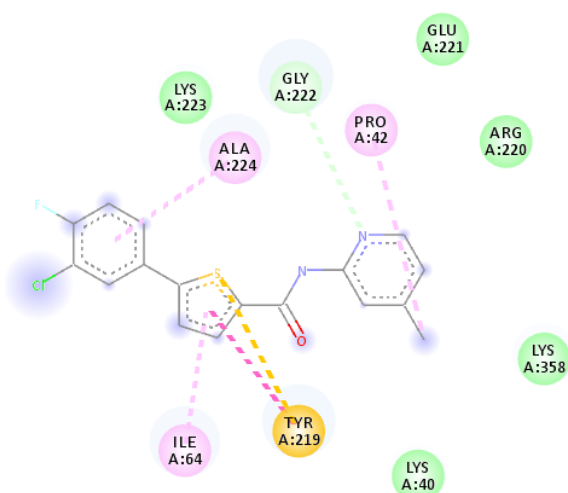**F**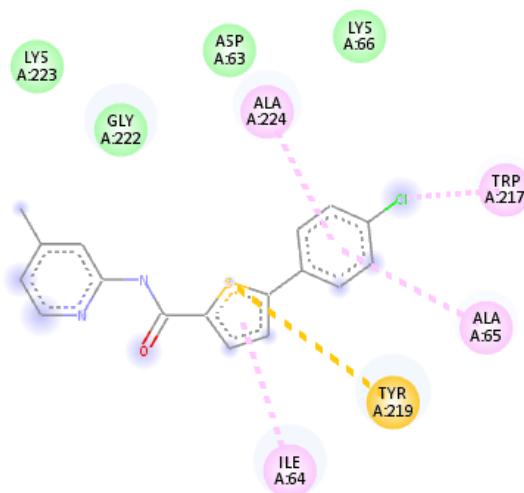

**Figure S1:** Protein ligand interaction analysis of ligands with Beta-lactamase from Escherichia coli (6N9K) protein (A) 6N9K interactions with **4b** compound (B) 6N9K interactions with **4d** compound (C) 6N9K interactions with **4e** compound (D) 6N9K interactions with **4f** compound (E) 6N9K interactions with **4g** compound (F) 6N9K interactions with **4h** compound

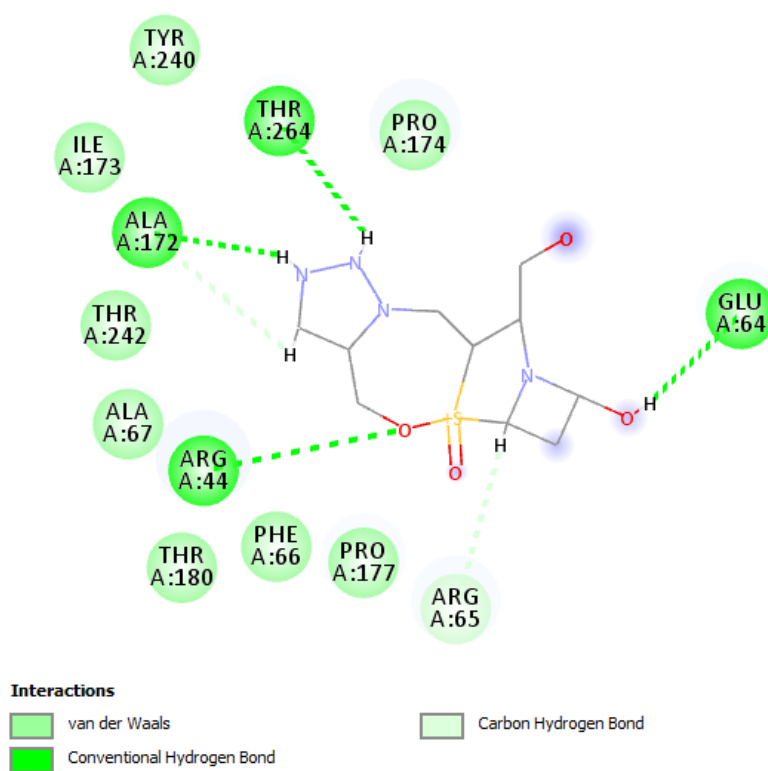

**Figure S2:** Docking interaction of tazobactam reported as  $\beta$ -lactamase inhibitors with CTX-M-15 enzyme (PDB ID: 7BDS).

**A**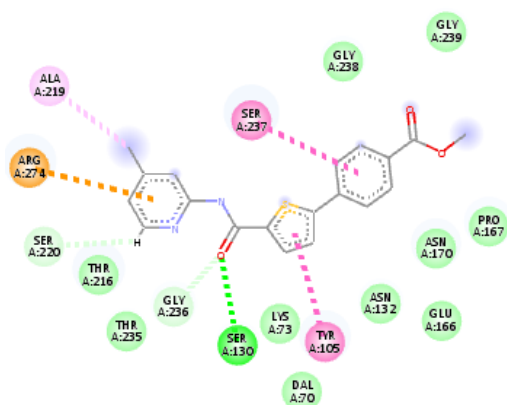**B**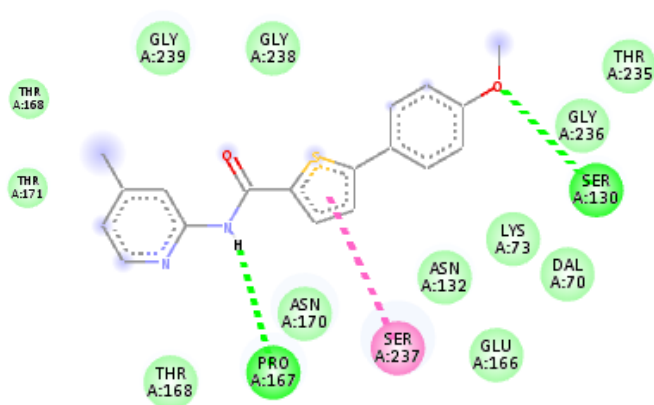**C**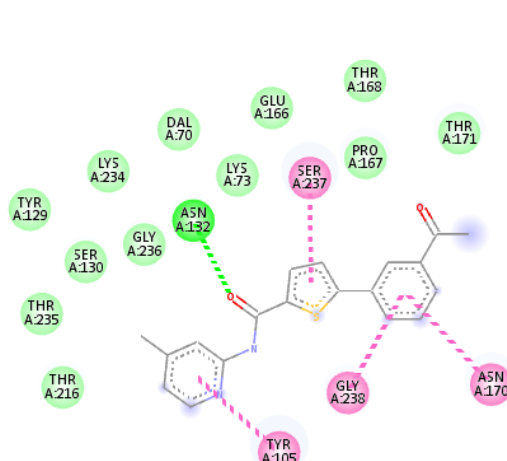**D**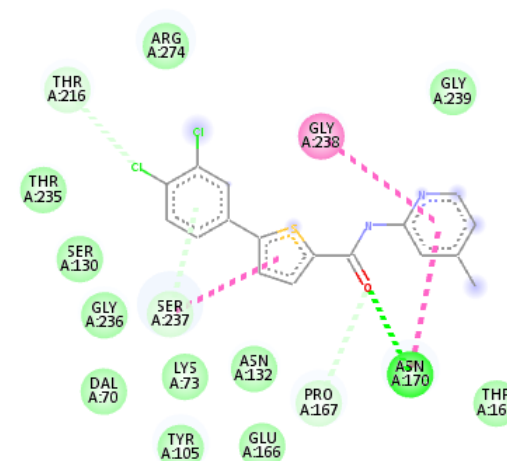**E**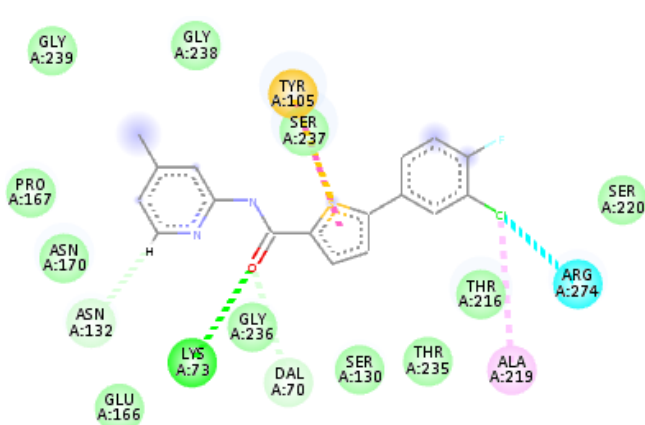**F**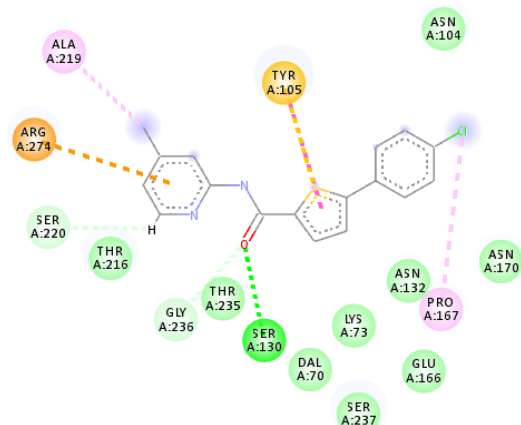

**Figure S3:** Protein ligand interaction analysis of ligands with Beta-lactamase from *Klebsiella pneumoniae* having expression in *Escherichia coli* (7BDS) protein (A) 7BDS interactions with **4b** compound (B) 7BDS interactions with **4d** compound (C) 7BDS interactions with **4e** compound (D) 6N9K interactions with **4f** compound (E) 7BDS interactions with **4g** compound (F) 7BDS interactions with **4h** compound

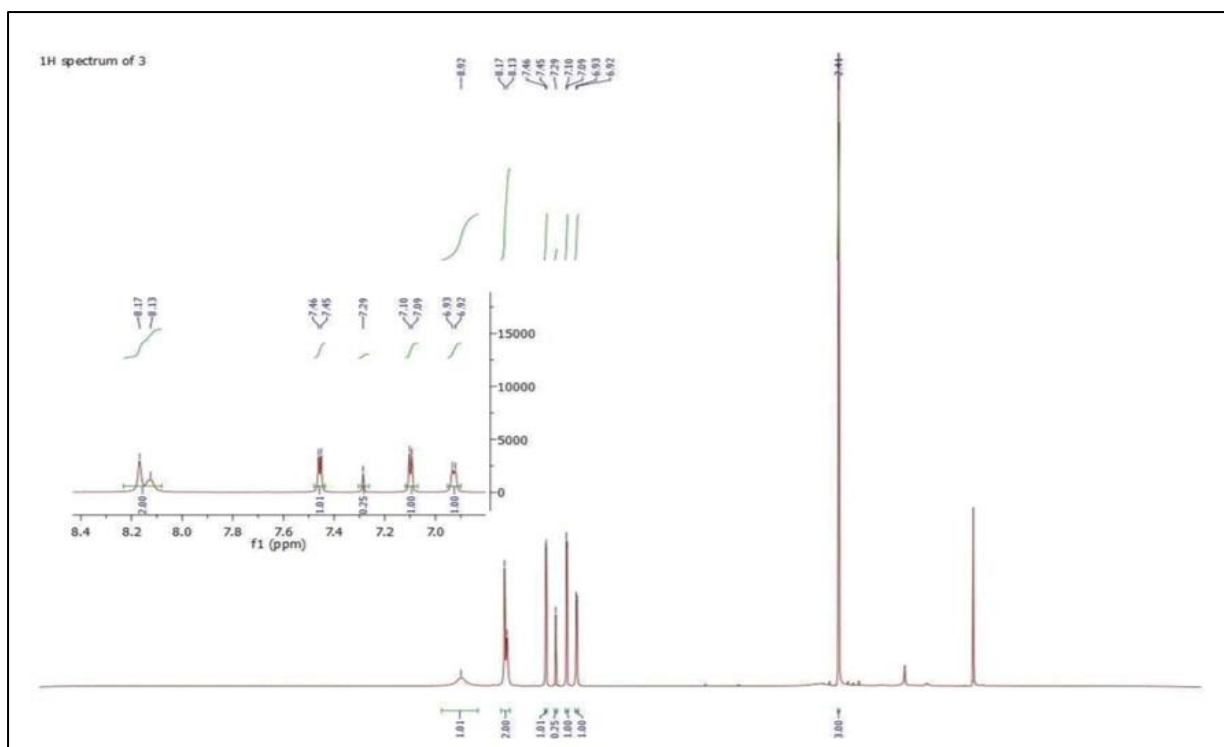

**Figure S4:** <sup>1</sup>H NMR (400 MHz, CDCl<sub>3</sub>) of compound **3**.

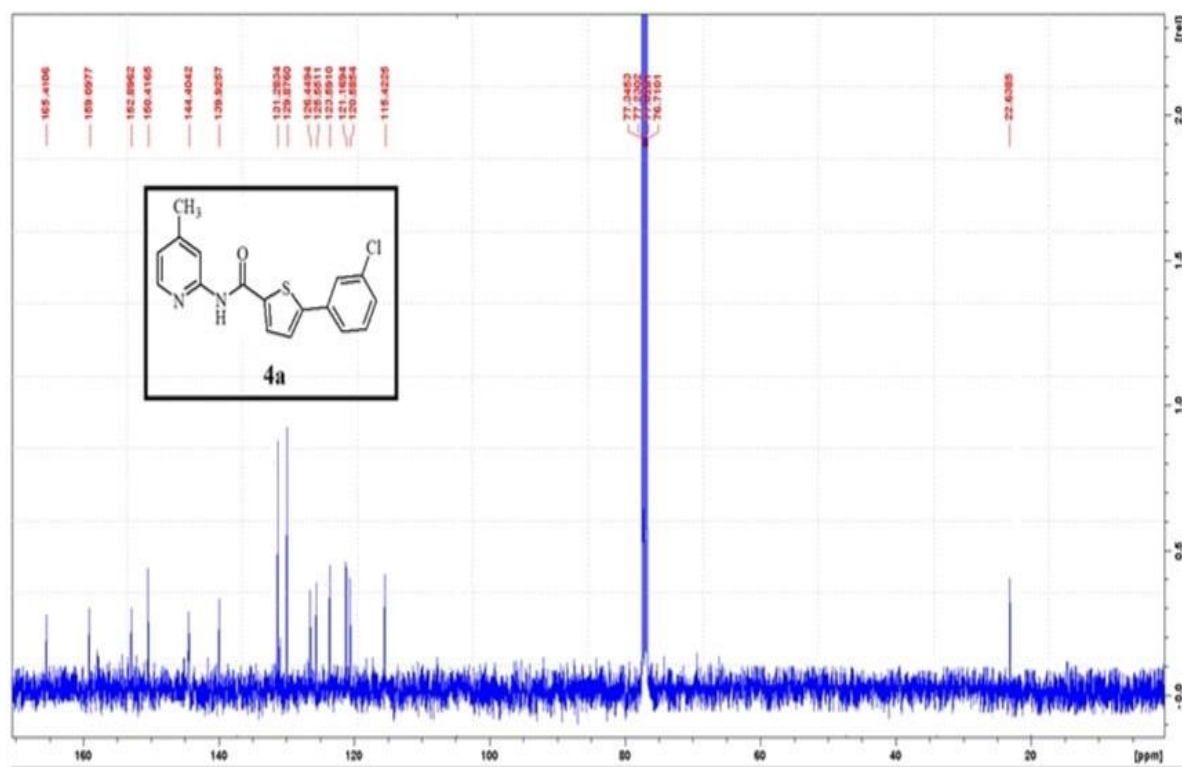

**Figure S5:** <sup>13</sup>C NMR (100 MHz, CDCl<sub>3</sub>) of compound **4a**.

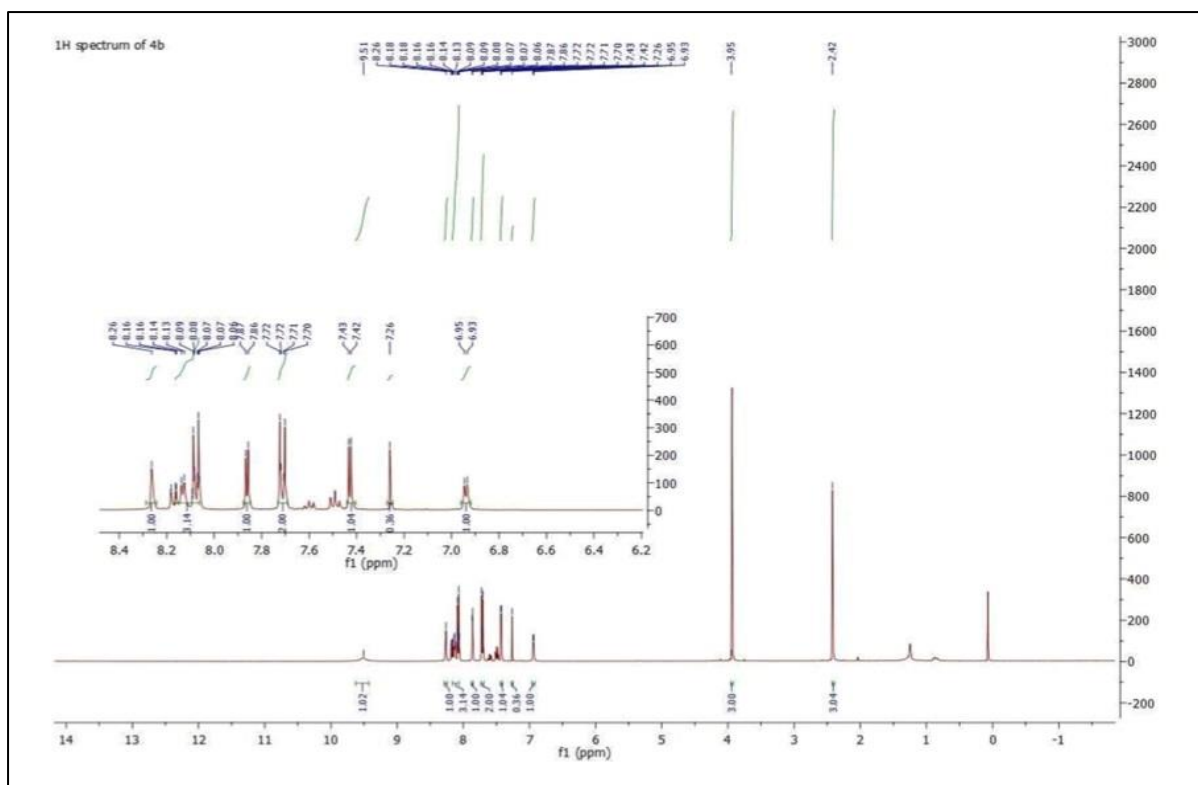

**Figure S6:**  $^1\text{H}$  NMR (400 MHz,  $\text{CDCl}_3$ ) of compound **4b**.

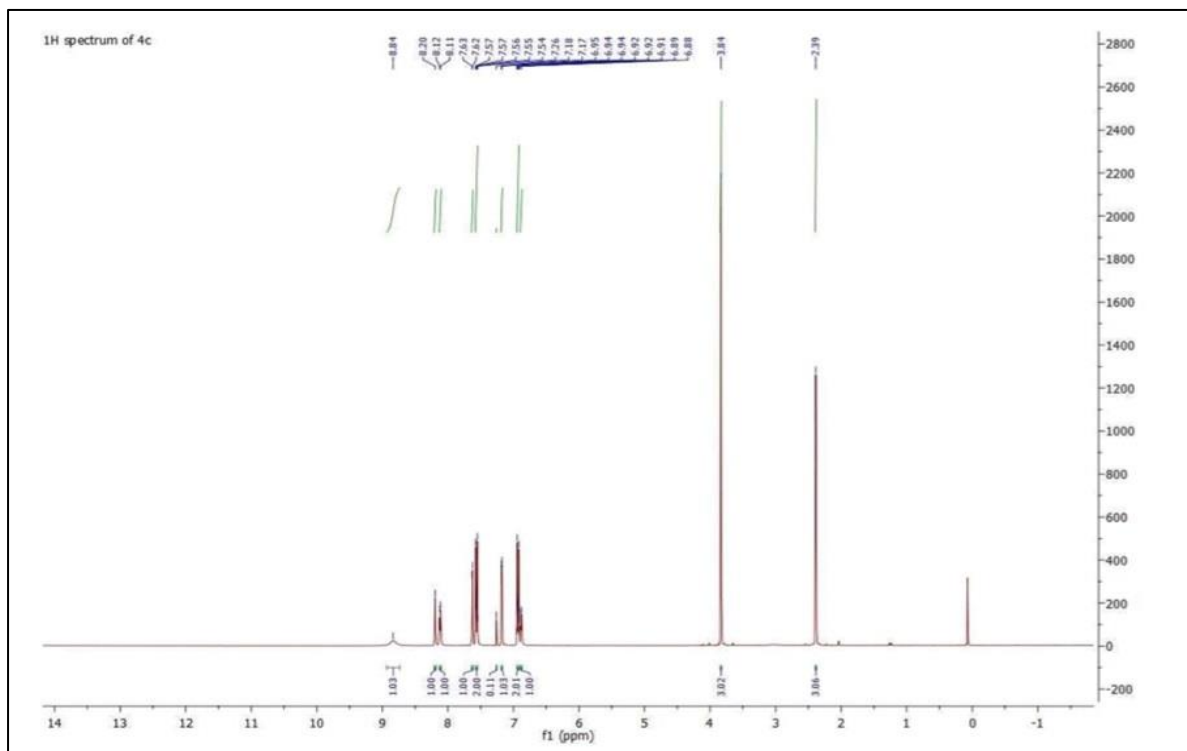

**Figure S7:**  $^1\text{H}$  NMR (400 MHz,  $\text{CDCl}_3$ ) of compound **4c**.





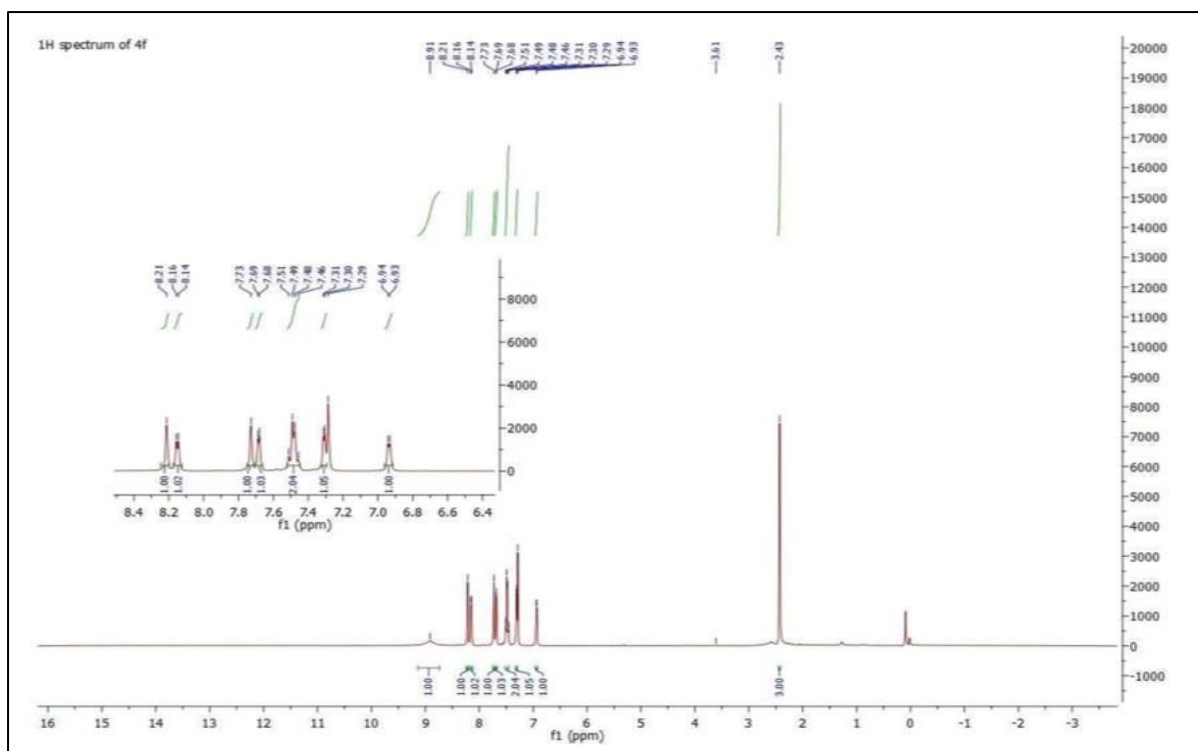

**Figure S10:** <sup>1</sup>H NMR (400 MHz, CDCl<sub>3</sub>) of compound **4f**.

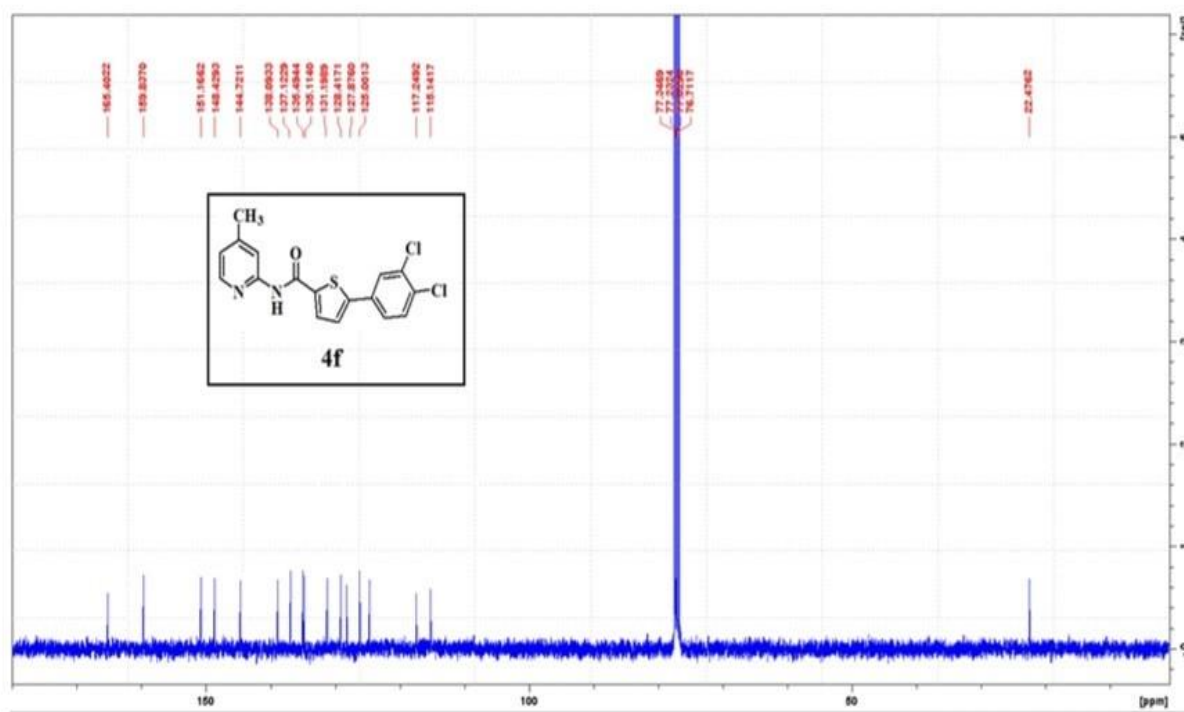

**Figure S11:** <sup>13</sup>C NMR (100 MHz, CDCl<sub>3</sub>) of compound **4f**.

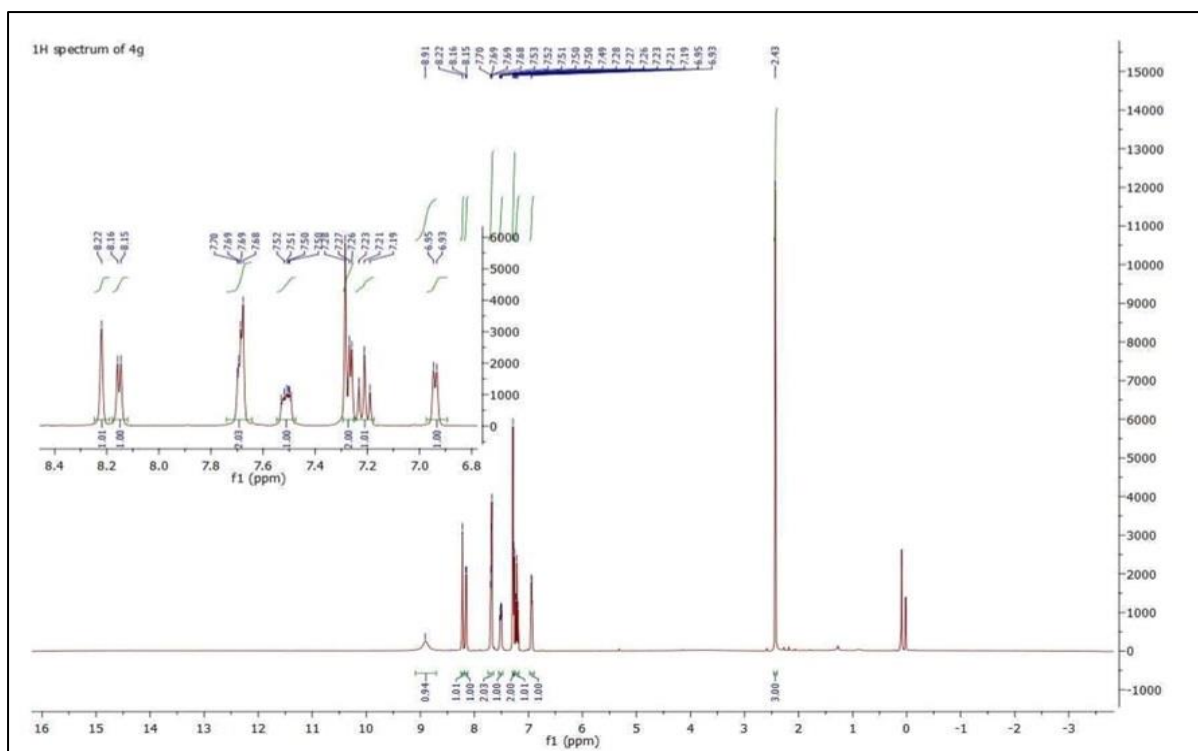

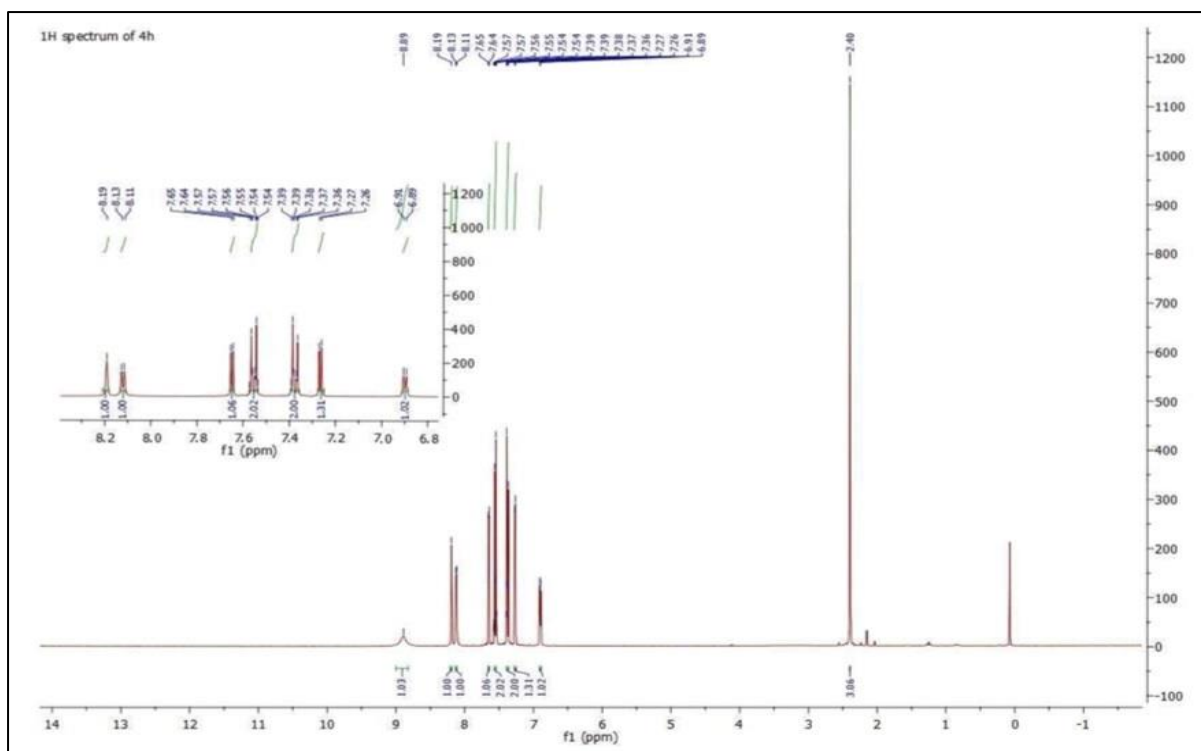

**Figure S14:**  $^1\text{H}$  NMR (400 MHz,  $\text{CDCl}_3$ ) of compound **4h**.
